# Supplementary material for: Outcomes of Robot-Assisted Surgery in Rectal Cancer Compared with Open and Laparoscopic Surgery
Source: Cancers (Basel). 2023 Jan 29;15(3):839. doi: 10.3390/cancers15030839 (PMC9913667; doi:10.3390/cancers15030839)
Supplement: Supplementary file 1 [file cancers-15-00839-s001.zip › cancers-2144743-supplementary.pdf]

## **Results**

### **Robotic surgery vs laparoscopic surgery**

#### ***Proximal resection margin***

The proximal resection margin was reported in seven studies, comprising 2,008 patients. The pooled analysis showed no significant differences in the proximal resection margin between the robotic surgery and laparoscopic surgery group (MD=-0.19; 95% CI: -0.47– 0.85;  $p=0.57$ ). There was high heterogeneity between studies in this analysis ( $I^2=97\%$ ;  $p<0.00001$ ) (Supplementary Figure S5).

#### ***Distal resection margin***

The distal resection margin was reported in nine studies, comprising 1,790 patients. The pooled analysis showed no significant differences in the distal resection margin between the robotic surgery group and laparoscopic surgery group (MD=0.04; 95% CI: -0.07–0.15;  $p=0.45$ ). There was no relevant heterogeneity between studies in this analysis ( $I^2=19\%$ ;  $p=0.27$ ). (Supplementary Figure S6)

#### ***Ileus***

Ileus was reported in nine studies, enrolling 2,690 patients. The pooled analysis showed no significant difference in ileus between the robotic surgery arm and laparoscopic surgery arm (OR=1.41; 95% CI: 0.92–2.16;  $p=0.12$ ). No heterogeneity was detected between studies in this meta-analysis ( $I^2=1\%$ ;  $p=0.43$ ) (Supplementary Figure S7).

#### ***Pain score***

The VAS pain score was reported in two studies. The meta-analysis showed no significant differences in VAS scores between the two arms (MD=-0.06; 95% CI: -0.36–0.23;  $p=0.67$ ).

No heterogeneity was detected between studies in this analysis ( $I^2=0\%$ ;  $p=0.75$ ) (Supplementary Figure S8).

### ***Respiratory complications***

Respiratory complications were reported in five studies, enrolling 2,177 patients. The pooled analysis showed no difference in respiratory complications between the robotic surgery group and the laparoscopic surgery group (OR=1.45; 95% CI: 0.72–2.93;  $p=0.30$ ). There was no heterogeneity between studies in this analysis ( $I^2=0\%$ ;  $p=0.44$ ) (Supplementary Figure S9).

### ***Urinary complications***

Urinary complications were reported in nine studies comprising 2,771 patients, 1,383 of whom underwent robotic surgery and 1,388 of whom underwent laparoscopic surgery. Urinary complications were reported in 54/1,388 (3.9%) patients in the robotic surgery group and in 44/1,383 (3.2%) patients in the laparoscopic surgery group. This difference was not significant (OR=1.22; 95% CI: 0.81–1.86;  $p=0.34$ ). No heterogeneity was detected in this analysis ( $I^2=0\%$ ;  $p=0.81$ ) (Supplementary Figure S10).

| Supplementary Table S1. Grades of recommendation, assessment, development, and evaluation (GRADE) assessment for outcomes of interest. |         |              |               |              |             |                  |                               |                            |                 |
|----------------------------------------------------------------------------------------------------------------------------------------|---------|--------------|---------------|--------------|-------------|------------------|-------------------------------|----------------------------|-----------------|
| Comparison                                                                                                                             | Studies | GRADE        |               |              |             |                  |                               |                            |                 |
|                                                                                                                                        |         | Risk of bias | Inconsistency | Indirectness | Imprecision | Publication bias | Large or moderate effect size | Exposure-response gradient | Overall quality |
| Robotic vs Open                                                                                                                        |         |              |               |              |             |                  |                               |                            |                 |
| Intraoperative complications                                                                                                           | 4       | Serious      | Not serious   | Not serious  | Serious     | Not serious      | Not present                   | Not present                | Low             |
| Estimated blood loss                                                                                                                   | 4       | Serious      | Serious       | Not serious  | Serious     | Not serious      | Not present                   | Not present                | Very low        |
| Operation time                                                                                                                         | 3       | Serious      | Serious       | Not serious  | Serious     | Not serious      | Not present                   | Not present                | Very low        |
| Anastomotic leakage                                                                                                                    | 4       | Serious      | Not serious   | Not serious  | Serious     | Not serious      | Not present                   | Not present                | Very low        |
| Surgical site infection                                                                                                                | 3       | Serious      | Not serious   | Not serious  | Serious     | Not serious      | Not present                   | Not present                | Low             |
| Postoperative complications                                                                                                            | 5       | Serious      | Serious       | Not serious  | Serious     | Not serious      | Not present                   | Not present                | Very low        |
| Major complications                                                                                                                    | 3       | Serious      | Not serious   | Not serious  | Serious     | Not serious      | Not present                   | Not present                | Low             |
| Length of hospital stay                                                                                                                | 5       | Serious      | Serious       | Not serious  | Serious     | Not serious      | Not present                   | Not present                | Very low        |
| Total harvested lymph nodes                                                                                                            | 4       | Serious      | Not serious   | Not serious  | Serious     | Not serious      | Not present                   | Not present                | Low             |
| Microscopic margin-free resection                                                                                                      | 3       | Serious      | Not serious   | Not serious  | Serious     | Not serious      | Not present                   | Not present                | Low             |
| Circumferential resection margin                                                                                                       | 4       | Serious      | Not serious   | Not serious  | Serious     | Not serious      | Not present                   | Not present                | Very low        |
| Robotic vs Laparoscopic                                                                                                                |         |              |               |              |             |                  |                               |                            |                 |
| Intraoperative complications                                                                                                           | 8       | Serious      | Serious       | Not serious  | Serious     | Not serious      | Not present                   | Not present                | Very low        |
| Conversion to open surgery                                                                                                             | 17      | Serious      | Serious       | Not serious  | Not serious | Not serious      | Not present                   | Not present                | Low             |
| Estimated blood loss                                                                                                                   | 9       | Serious      | Serious       | Not serious  | Not serious | Not serious      | Not present                   | Not present                | Low             |
| Operation time                                                                                                                         | 19      | Serious      | Serious       | Not serious  | Not serious | Not serious      | Not present                   | Not present                | Low             |
| Anastomotic leakage                                                                                                                    | 14      | Serious      | Not serious   | Not serious  | Serious     | Not serious      | Not present                   | Not present                | Very low        |
| Surgical site complications                                                                                                            | 12      | Serious      | Not serious   | Not serious  | Serious     | Not serious      | Not present                   | Not present                | Low             |
| Postoperative complications                                                                                                            | 18      | Serious      | Not serious   | Not serious  | Serious     | Not serious      | Not present                   | Not present                | Low             |
| Major complications                                                                                                                    | 15      | Serious      | Not serious   | Not serious  | Serious     | Not serious      | Not present                   | Not present                | Low             |
| Reoperation                                                                                                                            | 12      | Serious      | Not serious   | Not serious  | Not serious | Not serious      | Not present                   | Not present                | Moderate        |
| Length of hospital stay                                                                                                                | 18      | Serious      | Serious       | Not serious  | Serious     | Not serious      | Not present                   | Not present                | Very low        |
| TME completeness                                                                                                                       | 11      | Serious      | Not serious   | Not serious  | Serious     | Not serious      | Not present                   | Not present                | Low             |
| Total harvested lymph nodes                                                                                                            | 15      | Serious      | Serious       | Not serious  | Serious     | Not serious      | Not present                   | Not present                | Very low        |
| Microscopic margin-free resection                                                                                                      | 8       | Serious      | Not serious   | Not serious  | Serious     | Not serious      | Not present                   | Not present                | Very low        |
| Circumferential resection margin                                                                                                       | 14      | Serious      | Not serious   | Not serious  | Not serious | Not serious      | Not present                   | Not present                | Moderate        |
| Up to 90 days mortality                                                                                                                | 14      | Serious      | Not serious   | Not serious  | Serious     | Not serious      | Not present                   | Not present                | Low             |
| 1-year recurrence free survival                                                                                                        | 3       | Serious      | Not serious   | Not serious  | Serious     | Not serious      | Not present                   | Not present                | Low             |
| 3-year recurrence free survival                                                                                                        | 3       | Serious      | Serious       | Not serious  | Serious     | Not serious      | Not present                   | Not present                | Very low        |
| 1-year overall survival                                                                                                                | 3       | Serious      | Not serious   | Not serious  | Serious     | Not serious      | Not present                   | Not present                | Very low        |

|                                                     |   |              |             |             |         |             |             |             |          |
|-----------------------------------------------------|---|--------------|-------------|-------------|---------|-------------|-------------|-------------|----------|
| 3-year overall survival                             | 3 | Serious      | Not serious | Not serious | Serious | Not serious | Not present | Not present | Very low |
| Operative cost                                      | 2 | Serious      | Not serious | Not serious | Serious | Not serious | Not present | Not present | Low      |
| Proximal resection margin                           | 7 | Serious      | Not serious | Serious     | Serious | Not serious | Not present | Not present | Very low |
| Distal resection margin                             | 9 | Serious      | Not serious | Not serious | Serious | Not serious | Not present | Not present | Low      |
| Ileus                                               | 9 | Very serious | Not serious | Not serious | Serious | Not serious | Not present | Not present | Very low |
| Pain score                                          | 2 | Serious      | Not serious | Not serious | Serious | Not serious | Not present | Not present | Very low |
| Respiratory complications                           | 5 | Serious      | Not serious | Not serious | Serious | Not serious | Not present | Not present | Low      |
| Urinary complications                               | 9 | Serious      | Not serious | Not serious | Serious | Not serious | Not present | Not present | Low      |
| <b>Abbreviation:</b> TME, Total Mesorectal Excision |   |              |             |             |         |             |             |             |          |

| Supplementary Table S2. Meta analyses results and quality of evidence for outcome |                   |                                 |                                                                |                             |
|-----------------------------------------------------------------------------------|-------------------|---------------------------------|----------------------------------------------------------------|-----------------------------|
| Outcome                                                                           | Number of studies | Pooled relative effect (95% CI) | Statistical heterogeneity: I <sup>2</sup> (%); <i>p</i> -value | Quality of evidence (GRADE) |
| <b>Robotic vs Open</b>                                                            |                   |                                 |                                                                |                             |
| Intraoperative complications                                                      | 4                 | OR:1.21; (0.42 – 3.48)          | 0; 0.56                                                        | Low                         |
| Estimated blood loss                                                              | 4                 | MD:156.63; (62.36 – 250.91)     | 94; <0.00001                                                   | Very low                    |
| Operation time                                                                    | 3                 | MD:-66.90; (-93.35 – -40.46)    | 83; 0.003                                                      | Very low                    |
| Anastomotic leakage                                                               | 4                 | OR:1.04; (0.55 – 1.99)          | 0; 0.59                                                        | Very low                    |
| Surgical site infection                                                           | 3                 | OR:4.49; (1.05 – 19.24)         | 0; 0.72                                                        | Low                         |
| Postoperative complications                                                       | 5                 | OR:1.33; (0.65 – 2.71)          | 76; 0.002                                                      | Very low                    |
| Major complications                                                               | 3                 | OR:0.91; (0.56 – 1.47)          | 2; 0.36                                                        | Low                         |
| Length of hospital stay                                                           | 5                 | MD:2.51; (0.35 – 4.67)          | 94; <0.0001                                                    | Very low                    |
| Total harvested lymph nodes                                                       | 4                 | MD:0.86; (0.14 – 1.59)          | 27; 0.25                                                       | Low                         |
| Microscopic margin-free resection                                                 | 3                 | OR:6.01; (1.13 – 31.91)         | 0; 0.99                                                        | Low                         |
| Circumferential resection margin                                                  | 4                 | OR:3.39; (1.11 – 10.40)         | 0; 0.79                                                        | Very low                    |
| <b>Robotic vs Laparoscopic</b>                                                    |                   |                                 |                                                                |                             |
| Intraoperative complications                                                      | 8                 | OR:1.48; (0.95 – 2.32)          | 35; 0.09                                                       | Very low                    |
| Estimated blood loss                                                              | 9                 | MD:20.47; (7.57 – 33.36)        | 99; <0.00001                                                   | Low                         |
| Conversion to open surgery                                                        | 17                | OR:3.13; (1.87 – 5.21)          | 33; 0.10                                                       | Low                         |
| Operation time                                                                    | 19                | MD: -36.29 ; (-47.34– -25.25)   | 98; <0.00001                                                   | Low                         |
| Anastomotic leakage                                                               | 14                | OR:1.22; (0.90 – 1.65)          | 0; 0.54                                                        | Very low                    |
| Surgical site complications                                                       | 12                | OR:1.04; (0.63 – 1.73)          | 0; 0.90                                                        | Low                         |
| Postoperative complications                                                       | 18                | OR:1.11; (0.86 – 1.43)          | 43; 0.03                                                       | Low                         |
| Major complications                                                               | 15                | OR:1.19; (0.84 – 1.69)          | 15; 0.29                                                       | Low                         |
| Reoperation                                                                       | 12                | OR:1.69; (1.10 – 2.62)          | 0; 0.95                                                        | Moderate                    |
| Length of hospital stay                                                           | 18                | MD:-0.00; (-0.55 – 0.54)        | 96; <0.00001                                                   | Very low                    |
| TME completeness                                                                  | 11                | OR:1.09; (0.74 – 1.60)          | 29; 0.18                                                       | Low                         |
| Total harvested lymph nodes                                                       | 15                | MD:0.38; (-0.39 – 1.16)         | 59; 0.002                                                      | Very low                    |
| Microscopic margin-free resection                                                 | 8                 | OR:0.99; (0.36 – 2.70)          | 0; 0.50                                                        | Very low                    |
| Circumferential resection margin                                                  | 14                | OR:1.56; (1.11 – 2.20)          | 0; 0.59                                                        | Moderate                    |
| Up to 90 days mortality                                                           | 14                | OR:1.13; (0.30 – 4.20)          | 0; 0.95                                                        | Low                         |
| 1-year recurrence free survival                                                   | 3                 | OR:0.68; (0.28 – 1.62)          | 0; 0.82                                                        | Low                         |
| 3-year recurrence free survival                                                   | 3                 | OR:1.08; (0.39 – 2.96)          | 52; 0.12                                                       | Very low                    |
| 1-year overall survival                                                           | 3                 | OR:2.10; (0.54 – 8.07)          | 0; 0.64                                                        | Very low                    |
| 3-year overall survival                                                           | 3                 | OR: 1.13; (0.32 – 4.01)         | 48; 0.14                                                       | Very low                    |
| Operative cost (numbers are given in \$1000)                                      | 2                 | MD:-0.83; (-1.40 – -0.27)       | 99; <0.00001                                                   | Low                         |
| Proximal resection margin                                                         | 7                 | MD:-0.19; (-0.47 – 0.85)        | 97; <0.00001                                                   | Very low                    |
| Distal resection margin                                                           | 9                 | MD:0.04; (-0.07 – 0.15)         | 19; 0.27                                                       | Low                         |

|                                                                                                                   |   |                          |         |          |
|-------------------------------------------------------------------------------------------------------------------|---|--------------------------|---------|----------|
| Ileus                                                                                                             | 9 | OR:1.41; (0.92 – 2.16)   | 1; 0.43 | Very low |
| Pain score                                                                                                        | 2 | MD:-0.06; (-0.36 – 0.23) | 0; 0.75 | Very low |
| Respiratory complications                                                                                         | 5 | OR=1.45; (0.72–2.93)     | 0; 0.44 | Low      |
| Urinary complications                                                                                             | 9 | OR=1.22; (0.81–1.86)     | 0; 0.81 | Low      |
| <b>Abbreviation:</b> TME: Total mesorectal excision, OR: odds ratio, MD: mean difference, CI: confidence interval |   |                          |         |          |

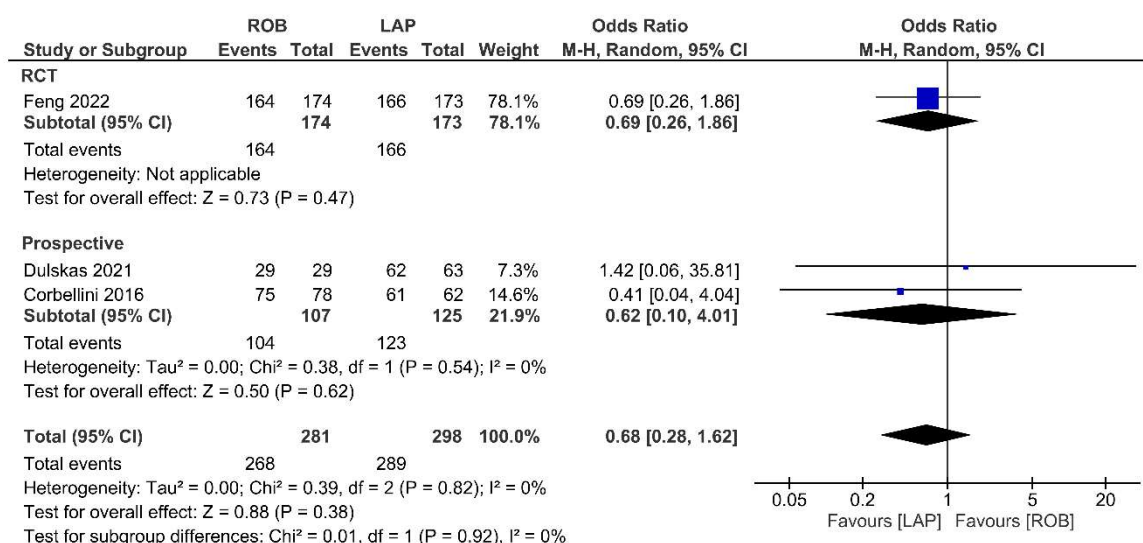

**Supplementary Figure S1.** Forest plots comparing 1-year recurrence free survival between robotic and laparoscopic rectal resection (blue boxes representing odd ratios, arrows representing 95% confidence intervals, and diamonds representing point estimates of pooled odd ratios or mean differences).

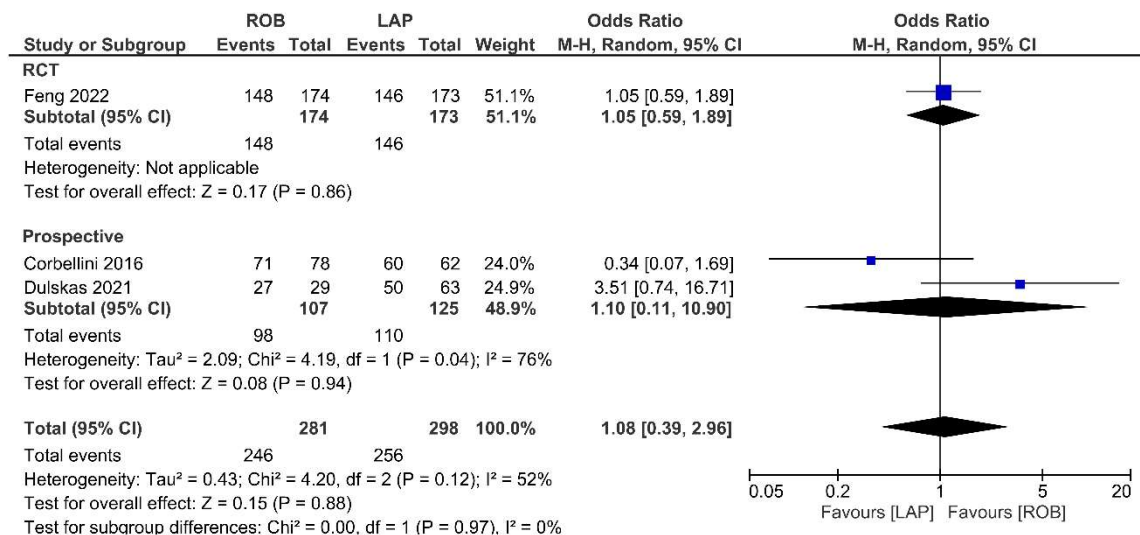

**Supplementary Figure S2.** Forest plots comparing 3-year recurrence free survival between robotic and laparoscopic rectal resection (blue boxes representing odd ratios, arrows representing 95% confidence intervals, and diamonds representing point estimates of pooled odd ratios or mean differences).

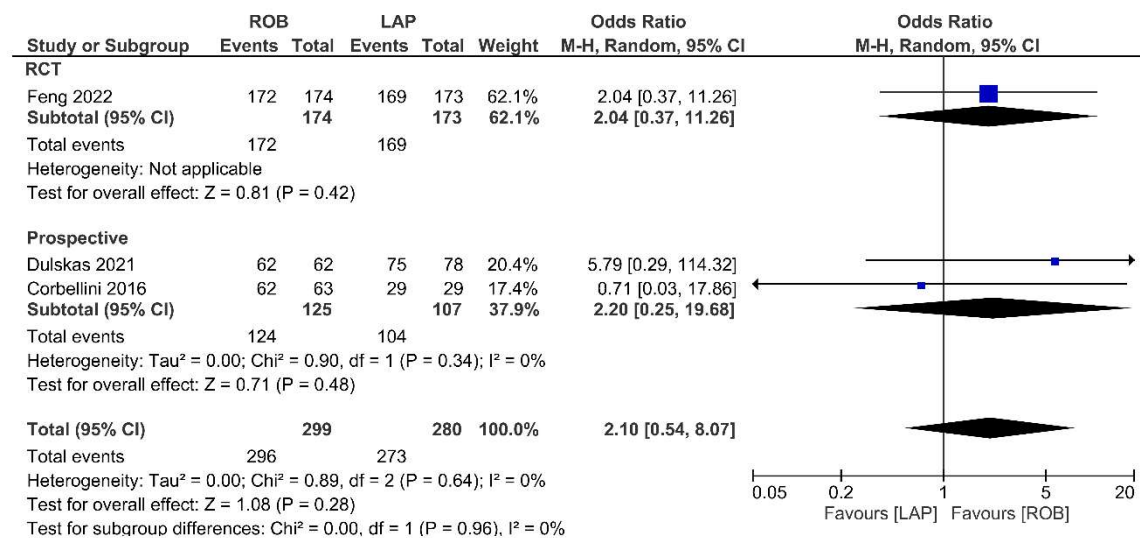

**Supplementary Figure S3.** Forest plots comparing 1-year overall survival between robotic and laparoscopic rectal resection (blue boxes representing odd ratios, arrows representing 95% confidence intervals, and diamonds representing point estimates of pooled odd ratios or mean differences).

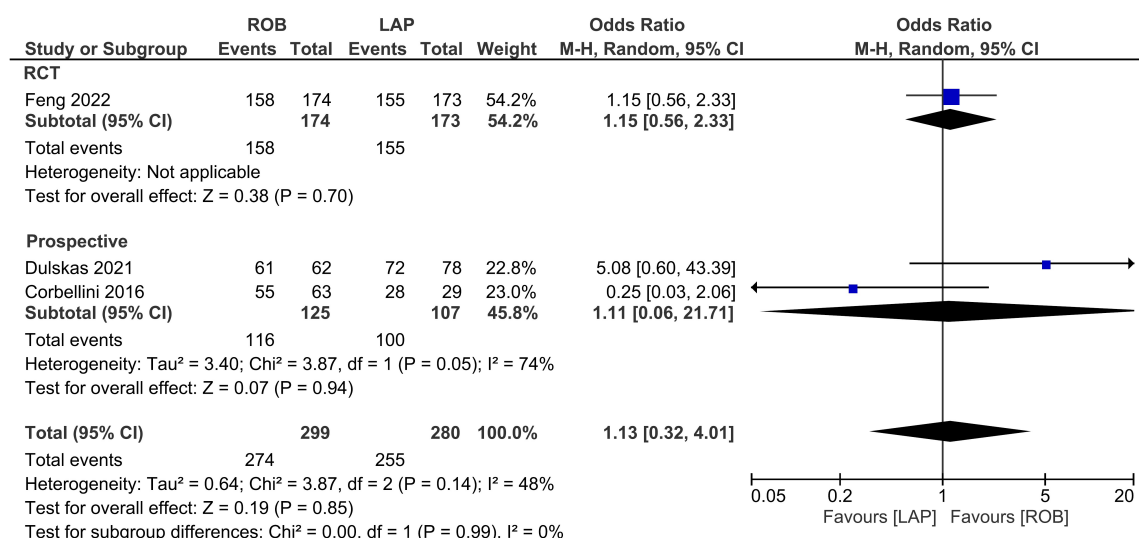

**Supplementary Figure S4.** Forest plots comparing 3-year overall survival between robotic and laparoscopic rectal resection (blue boxes representing odd ratios, arrows representing 95% confidence intervals, and diamonds representing point estimates of pooled odd ratios or mean differences).

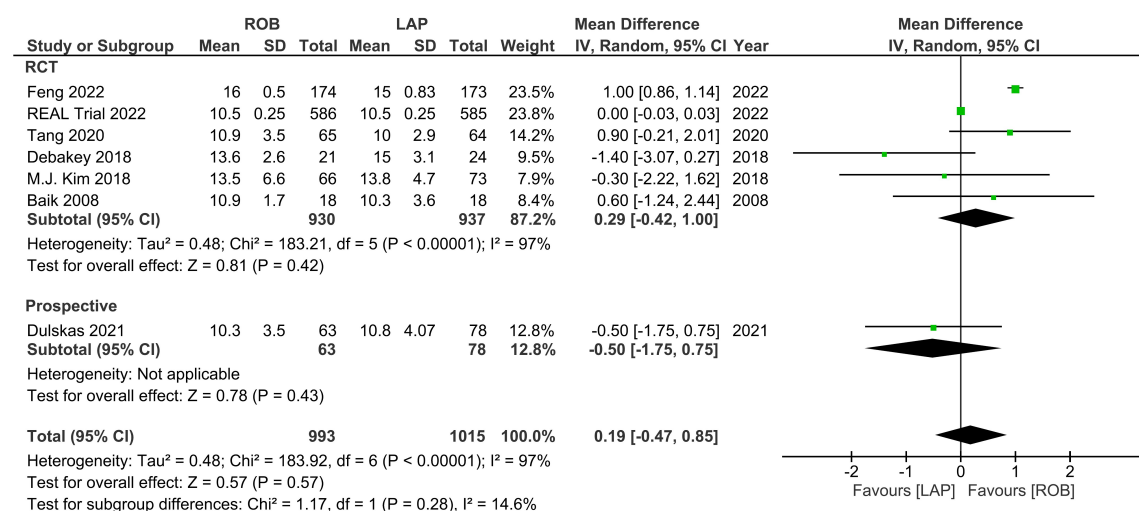

**Supplementary Figure S5.** Forest plot comparing proximal resection margin between robotic and laparoscopic rectal resection (green boxes representing mean differences, arrows representing 95% confidence intervals, and diamonds representing point estimates of pooled odd ratios or mean differences).

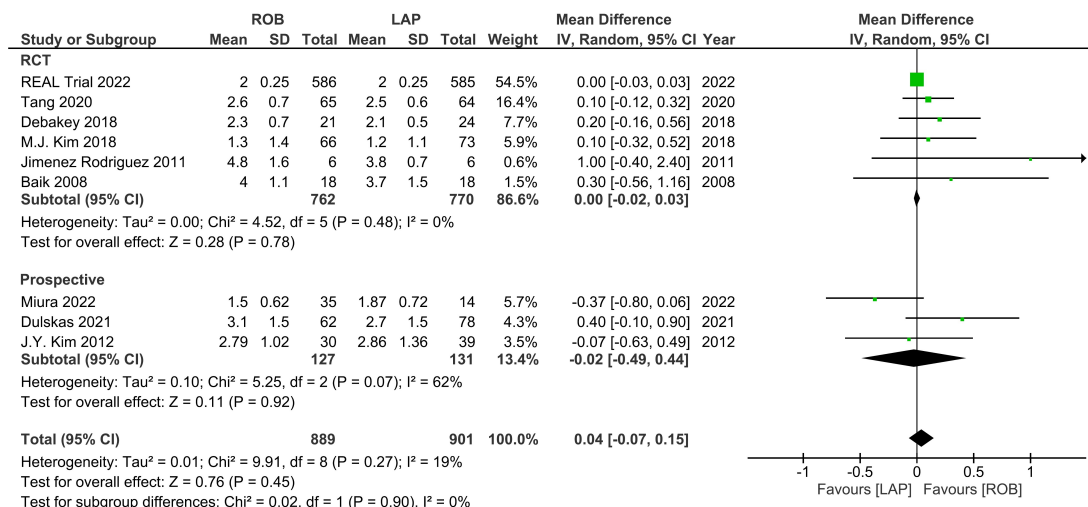

**Supplementary Figure S6.** Forest plot comparing distal resection margin between robotic and laparoscopic rectal resection (green boxes representing mean differences, arrows representing 95% confidence intervals, and diamonds representing point estimates of pooled odd ratios or mean differences).

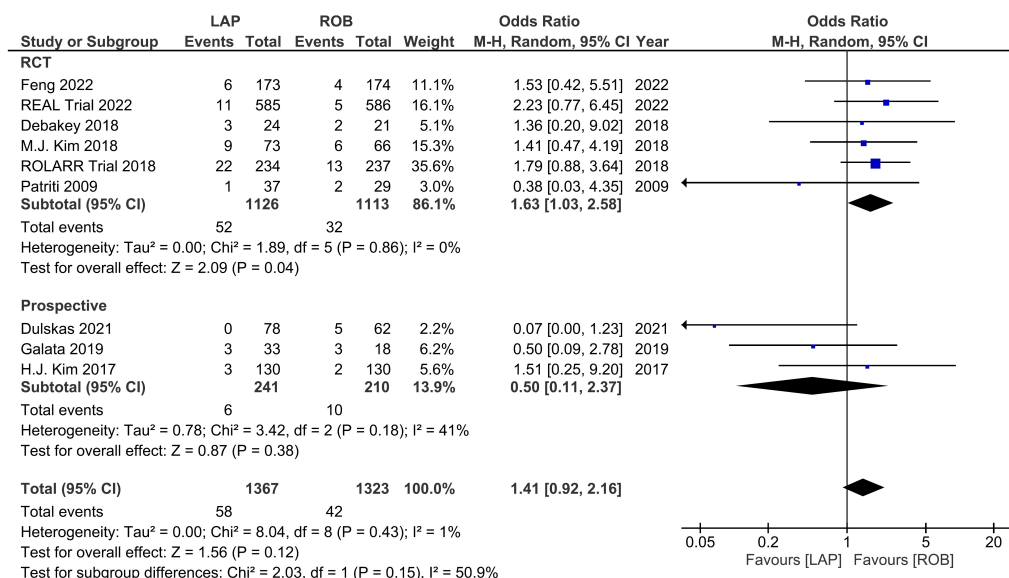

**Supplementary Figure S7.** Forest plot comparing ileus between robotic and laparoscopic rectal resection (blue boxes representing odd ratios, arrows representing 95% confidence intervals, and diamonds representing point estimates of pooled odd ratios or mean differences).

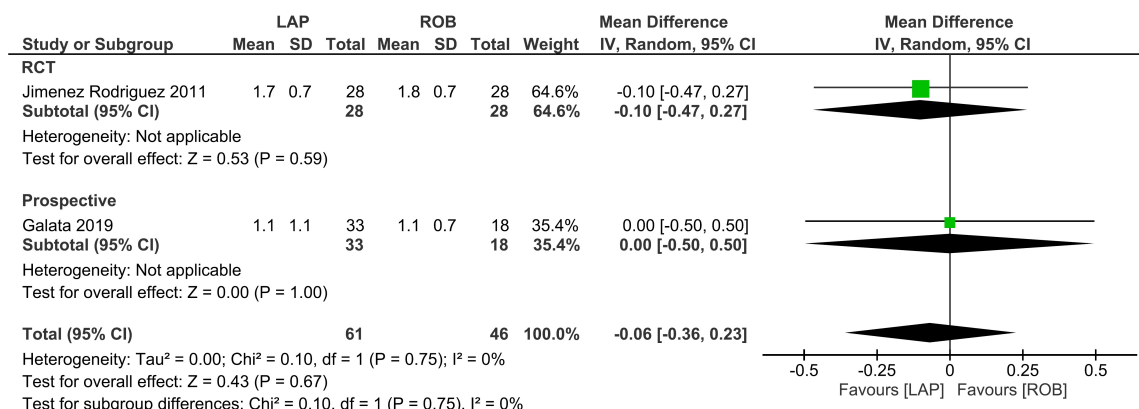

**Supplementary Figure S8.** Forest plot comparing pain score between robotic and laparoscopic rectal resection (green boxes representing mean differences, arrows representing 95% confidence intervals, and diamonds representing point estimates of pooled odd ratios or mean differences).

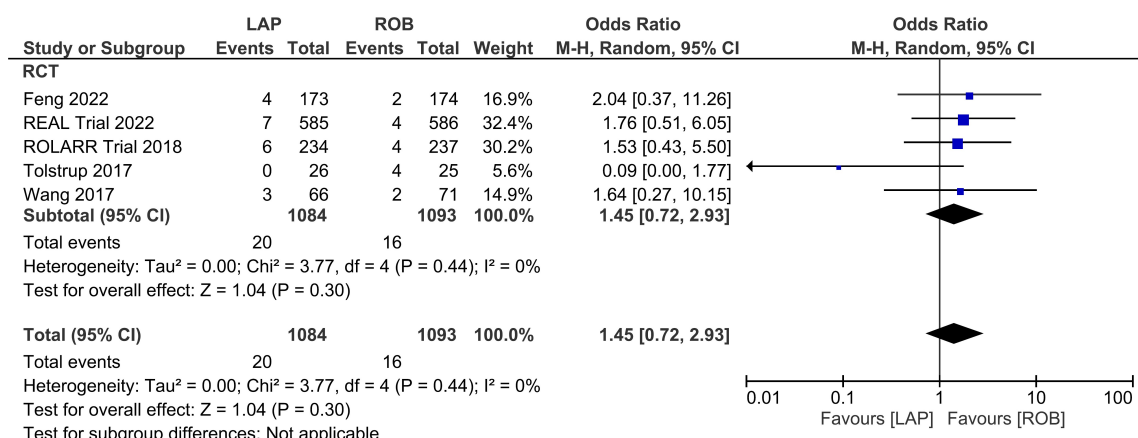

**Supplementary Figure S9.** Forest plot comparing respiratory complications between robotic and laparoscopic rectal resection (blue boxes representing odd ratios, arrows representing 95% confidence intervals, and diamonds representing point estimates of pooled odd ratios or mean differences).

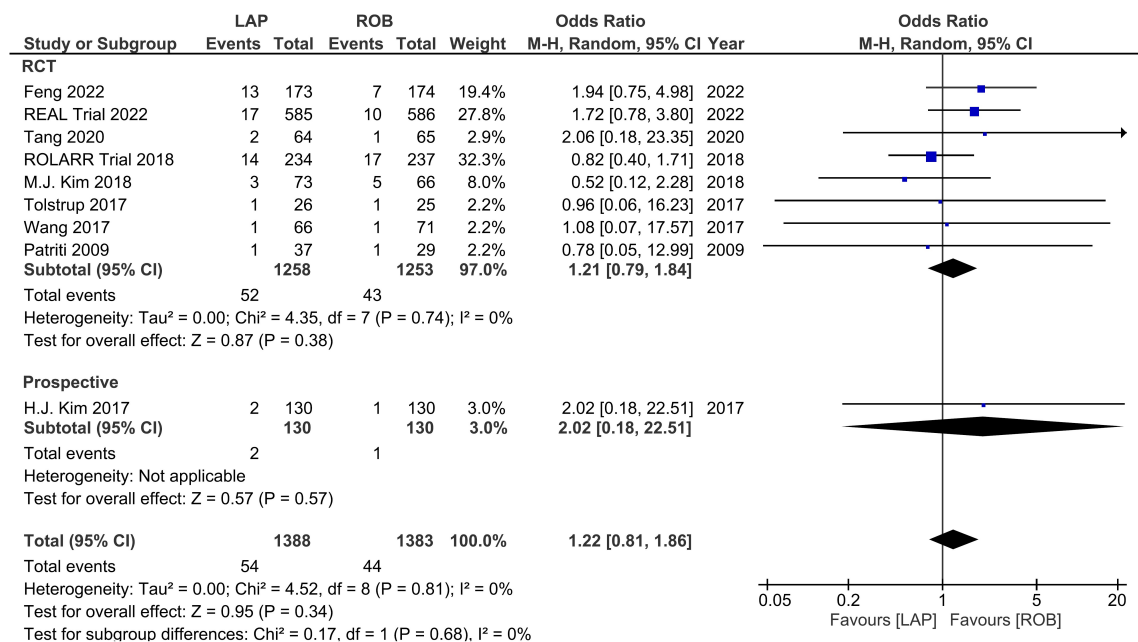

**Supplementary Figure S10.** Forest plot comparing urinary complications between robotic and laparoscopic rectal resection (blue boxes representing odd ratios, arrows representing 95% confidence intervals, and diamonds representing point estimates of pooled odd ratios or mean differences).
